# Supplementary material for: Effects of an Invasive Mud Crab on a Macroalgae-Dominated Habitat of the Baltic Sea under Different Temperature Regimes
Source: MDPI journal article supplement (doi:10.3390/d15050644), 2023-05-09
Supplement: s1 [file s1]

## Supplementary material

**Table S1.** Tukey's Honest Significant Difference (Tukey HSD) test for those biological and environmental response variables that exhibited significant main effects of the mud crab *Rhithropanopeus harrisi* or interactive effects of the invader and temperature in the analysis of variance (ANOVA). The contrast between different treatments (CW: control, winter; CS: control, summer; RhW: crab, winter; RhS: crab, summer), mean estimates (estimates), standard errors (SE), degrees of freedom (DF), the statistic (t-value) and associated significance (p-value) are presented. Logarithmically transformed variables are indicated with log

| Response variable            | Contrast  | Estimate | SE   | DF | t-value | p-value            |
|------------------------------|-----------|----------|------|----|---------|--------------------|
| log(abundance of bivalves)   | CW - RhW  | 0.01     | 0.72 | 16 | 0.01    | 1.0000             |
|                              | CW - CS   | 0.02     | 0.72 | 16 | 0.03    | 1.0000             |
|                              | CW - RhS  | 3.08     | 0.72 | 16 | 4.26    | <b>0.0030</b>      |
|                              | RhW - CS  | 0.01     | 0.72 | 16 | 0.02    | 1.0000             |
|                              | RhW - RhS | 3.07     | 0.72 | 16 | 4.24    | <b>0.0003</b>      |
|                              | CS - RhS  | 3.06     | 0.72 | 16 | 4.23    | <b>0.0003</b>      |
| log(abundance of gastropods) | CW - RhW  | 0.19     | 0.30 | 16 | 0.64    | 0.9173             |
|                              | CW - CS   | -1.50    | 0.30 | 16 | -5.04   | <b>0.0006</b>      |
|                              | CW - RhS  | -0.31    | 0.30 | 16 | -1.05   | 0.7256             |
|                              | RhW - CS  | -1.69    | 0.30 | 16 | -5.68   | <b>0.0002</b>      |
|                              | RhW - RhS | -0.50    | 0.30 | 16 | -1.69   | 0.3621             |
|                              | CS - RhS  | 1.19     | 0.30 | 16 | 4.00    | 0.0052             |
| log(dry weight of bivalve)   | CW - RhW  | -0.07    | 0.47 | 16 | -0.15   | 0.9988             |
|                              | CW - CS   | -0.06    | 0.47 | 16 | -0.13   | 0.9992             |
|                              | CW - RhS  | 2.26     | 0.47 | 16 | 4.80    | <b>0.0010</b>      |
|                              | RhW - CS  | 0.01     | 0.47 | 16 | 0.02    | 1.0000             |
|                              | RhW - RhS | 2.33     | 0.47 | 16 | 4.94    | <b>0.0008</b>      |
|                              | CS - RhS  | 2.33     | 0.47 | 16 | 4.93    | <b>0.0008</b>      |
| dry weight of gastropods     | CW - RhW  | -0.04    | 0.09 | 16 | -0.45   | 0.9693             |
|                              | CW - CS   | -0.21    | 0.09 | 16 | -2.48   | 0.1017             |
|                              | CW - RhS  | 0.37     | 0.09 | 16 | 4.28    | <b>0.0029</b>      |
|                              | RhW - CS  | -0.17    | 0.09 | 16 | -2.03   | 0.2173             |
|                              | RhW - RhS | 0.41     | 0.09 | 16 | 4.73    | <b>0.0012</b>      |
|                              | CS - RhS  | 0.58     | 0.09 | 16 | 6.76    | <b>&lt; 0.0001</b> |
| dry weight of Fucus          | CW - RhW  | -4.11    | 5.20 | 16 | -0.79   | 0.8578             |
|                              | CW - CS   | -26.71   | 5.20 | 16 | -5.13   | <b>0.0005</b>      |
|                              | CW - RhS  | -12.71   | 5.20 | 16 | -2.44   | 0.1085             |
|                              | RhW - CS  | -22.60   | 5.20 | 16 | -4.34   | <b>0.0025</b>      |
|                              | RhW - RhS | -8.60    | 5.20 | 16 | -1.65   | 0.3788             |
|                              | CS - RhS  | 14.00    | 5.20 | 16 | 2.69    | 0.0690             |
| log(NO <sub>2</sub> )        | CW - RhW  | -0.14    | 0.35 | 16 | -0.41   | 0.9761             |

|           |       |      |    |        |                    |
|-----------|-------|------|----|--------|--------------------|
| CW - CS   | -3.25 | 0.35 | 16 | -9.34  | <b>&lt; 0.0001</b> |
| CW - RhS  | -4.16 | 0.35 | 16 | -11.97 | <b>&lt; 0.0001</b> |
| RhW - CS  | -3.11 | 0.35 | 16 | -8.93  | <b>&lt; 0.0001</b> |
| RhW - RhS | -4.02 | 0.35 | 16 | -11.56 | <b>&lt; 0.0001</b> |
| CS - RhS  | -0.91 | 0.35 | 16 | -2.63  | 0.0777             |

---
